# Supplementary material for: Electronic structures of Zn1−xGaxO1−xNx and band offsets of the ZnO/Zn1−xGaxO1−xNx heterojunction across the entire concentration range from first principles
Source: Royal Society of Chemistry journal article supplement (doi:10.1039/d1cp04923b), 2021-11-26
Supplement: d1cp04923b1.pdf [file d1cp04923b1.pdf]

## Supporting information for

# Electronic structures of $\text{Zn}_{1-x}\text{Ga}_x\text{O}_{1-x}\text{N}_x$ and band offsets of $\text{ZnO}/\text{Zn}_{1-x}\text{Ga}_x\text{O}_{1-x}\text{N}_x$ heterojunction across the entire concentration range from first principles

Tianjiao Li<sup>1</sup>, Xiaojie Liu<sup>1\*</sup>, Yin Wang<sup>2‡</sup>, Ronggen Cao<sup>3</sup>, Haitao Yin<sup>1‡</sup>

1. Key Laboratory for Photonic and Electronic Bandgap Materials of Ministry of Education, School of Physics and Electronic Engineering, Harbin Normal University, Harbin 150025, China
2. Department of Physics and International Centre for Quantum and Molecular Structures, Shanghai University, Shanghai 200444, China
3. Department of Materials Science, Fudan University, Shanghai 200433, China

### 1. Atomic sphere approximation (ASA)

Atomic sphere approximation (ASA) assumes that unit-cell (or supercell) is filled with slightly overlapped atomic spheres to meet the condition of that the total volume of atom spheres equals to the volume of the cell. If the atomic structure is far from close packed, the space between atoms must be filled with vacancy spheres. Different ASA scheme, i.e., different sphere positions and radii, will affect the calculated electronic structure. Wurtzite structure (e.g., ZnO, GaN) can be made nearly close packed by adding two types of vacancy sites. Consider a primitive cell and let the lattice constants of hexagonal wurtzite structure ZnO or GaN:  $a = 3.2495\text{Å}$ ,  $c/a = 1.60247$ ,  $u = 0.382c$  and the unit-cell vectors are  $\mathbf{a}_1 = [a, 0, 0]$ ,  $\mathbf{a}_2 = [-1/2a, \sqrt{3}/2a, 0]$ ,  $\mathbf{a}_3 = [0, 0, c]$ . The detail positions of atomic spheres are given in Table 1.

To optimize the radii of atomic sphere, we calculated the band structure of pure ZnO and GaN crystal at the level of LDA. By compare with band structure obtained with the Vienna Ab initio Simulation Package (VASP), we can get proper the radii for atoms and vacancy spheres as shown in Table 1. Figure s1 shows the band structures obtained from the VASP and our ASA

\* redlxj@126.com(Xiaojie Liu);

‡ yinwang@shu.edu.cn (Yin Wang);

‡ wlyht@126.com(Haito Yin)

under the frame of LMTO, respectively. The agreement is excellent - suggesting the appropriateness of our ASA scheme.

**Table 1** Positions and radii of the atomic spheres and empty spheres for ZnO and GaN

| site                   | Zn/Ga  |                      | O/N         |                           | Vac1                    |                        | Vac2                   |                         |
|------------------------|--------|----------------------|-------------|---------------------------|-------------------------|------------------------|------------------------|-------------------------|
| x                      | 0      | $\frac{1}{2}$        | 0           | $\frac{1}{2}$             | 0                       | $\frac{1}{2}$          | 0                      | 0                       |
| y                      | 0      | $\frac{\sqrt{3}}{6}$ | 0           | $\frac{\sqrt{3}}{6}$      | 0                       | $\frac{\sqrt{3}}{6}$   | $\frac{\sqrt{3}}{3}$   | $\frac{\sqrt{3}}{3}$    |
| z                      | 0      | $\frac{1}{2}c$       | $u \cdot c$ | $(\frac{1}{2}+u) \cdot c$ | $\frac{1+u}{2} \cdot c$ | $\frac{1}{2}u \cdot c$ | $\frac{1}{2}u \cdot c$ | $\frac{1+u}{2} \cdot c$ |
| Radius( $\text{\AA}$ ) | 1.1481 |                      | 1.1481      |                           | 0.7654                  |                        | 1.3023                 |                         |

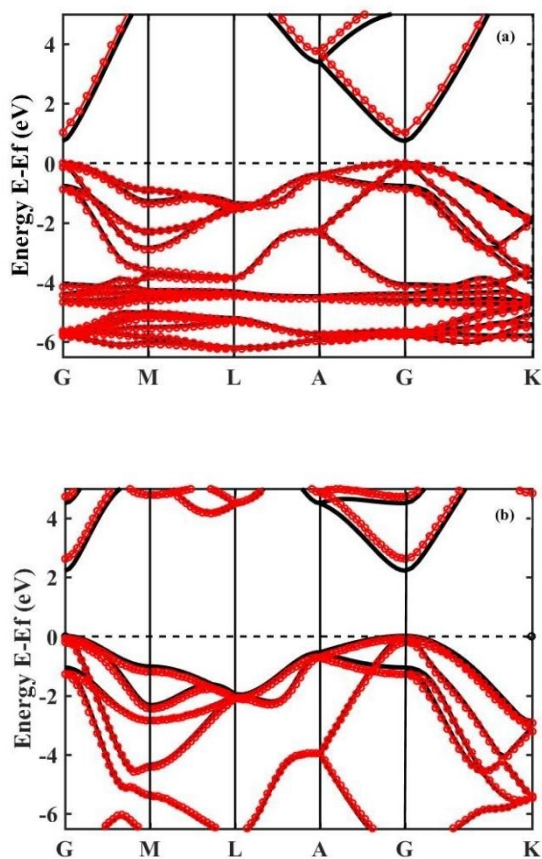

**Figure s1.** Calculated LDA band structure of (a) pure ZnO and (b) pure GaN. Black solid lines were obtained by the plane wave electronic package VASP, and red circles by NANODSIM

## 2. Method for calculating the band offsets of heterojunction

We consider a heterojunction A/B which formed by two lattice matched semiconductor A and B. In an individual calculation for each semiconductor A or B, the valence band edge  $E_v(A)$  or

$E_v(B)$  can be obtained with respect to the average of the electrostatic potential  $E_{es}(A)$  or  $E_{es}(B)$  in each bulk material. However, because the calculations on the two materials A and B are carried out independently, namely, the energies in A or B are not respect to the same reference point, the energy relation between the two calculations are ill defined. Therefore, the manipulation of adding or subtracting energies between A and B is of no any physical meaning.

To calculate the band offset of heterojunction A/B, we further carried out a calculation on the heterojunction A/B where each part A and B are long enough so that the electrostatic potential  $E_{es}(A)'$  or  $E_{es}(B)'$  in the each center regions of A and B are not affected by the interface and can be treated as a bulk. Because the energies in A or B are respect to the same reference point in the calculation on a heterojunction A/B, we can obtain the valence band offset (VBO) from the difference between the valence band edge  $E_v(A)'$  and  $E_v(B)'$  inside the heterojunction. To calculate the VBO as defined by  $(E_v(A)' - E_v(B)'),$  we start from the following relationship,

$$E_v(A) - E_{es}(A) = E_v(A)' - E_{es}(A)', \quad (1)$$

$$E_v(B) - E_{es}(B) = E_v(B)' - E_{es}(B)'. \quad (2)$$

The physical meaning of the above equations is that the difference between the energy edge and the average electrostatic potential of a bulk material keep unchanged. We can easily obtained from Eq. (1) and (2) as following

$$E_v(A)' - E_v(B)' = [E_v(A) - E_{es}(A)] - [E_v(B) - E_{es}(B)] + [E_{es}(A)' - E_{es}(B)']. \quad (3)$$

The items in the first and second square brackets correspond to the energy difference ( $\Delta E_v = [E_v(A) - E_{es}(A)] - [E_v(B) - E_{es}(B)]$ ) between the valence band edges of the two independent bulk semiconductors A and B that form the heterojunction, and the items in the third square brackets the lineup of the potential through the heterojunction ( $\Delta V = [E_{es}(A)' - E_{es}(B)']$ ), respectively.

For conduction band offset, the same calculation procedure can be applied. Clearly, the band offset can be calculated by

$$VBO (CBO) = \Delta E_{v(c)} + \Delta V. \quad (4)$$

3. Table 2: Band gaps of  $Zn_{1-x}Ga_xO_{1-x}N_x$  vs the concentration of GaN  $x$ . The energy unit is eV.

| $x$   | 0     | 0.1   | 0.2   | 0.3   | 0.4   | 0.5   | 0.6   | 0.7   | 0.8   | 0.9   | 1.0   |
|-------|-------|-------|-------|-------|-------|-------|-------|-------|-------|-------|-------|
| $E_g$ | 3.369 | 1.846 | 1.585 | 1.485 | 1.485 | 1.524 | 1.644 | 1.826 | 2.086 | 2.528 | 3.468 |

4. Table 3:  $\Delta E_v$ ,  $\Delta E_c$ ,  $\Delta V$ , VBO and CBO of ZnO/Zn<sub>1-x</sub>Ga<sub>x</sub>O<sub>1-x</sub>N<sub>x</sub> heterojunctions vs the concentration of GaN  $x$ , The energy unit is eV.

| $x$          | 0 | 0.1               | 0.2                | 0.3                | 0.4                | 0.5                | 0.6                | 0.7                | 0.8                | 0.9                | 1.0                |
|--------------|---|-------------------|--------------------|--------------------|--------------------|--------------------|--------------------|--------------------|--------------------|--------------------|--------------------|
| $\Delta E_v$ | 0 | -<br>0.907        | -<br>1.018<br>3431 | -<br>1.044<br>7376 | -<br>1.0729<br>009 | -<br>1.1137<br>174 | -<br>1.130<br>8605 | -<br>1.1241<br>871 | -<br>1.1198<br>88  | -<br>1.0192<br>073 | -<br>0.7629<br>046 |
| $\Delta E_c$ | 0 | 0.616             | 0.765<br>6569      | 0.839<br>4624      | 0.8112<br>991      | 0.7313<br>826      | 0.594<br>0395      | 0.4194<br>129      | 0.1630<br>12       | -<br>0.1780<br>073 | -<br>0.6641<br>046 |
| $\Delta V$   | 0 | -<br>0.163<br>266 | -<br>0.280<br>3    | -<br>0.356<br>4641 | -<br>0.3945<br>595 | -<br>0.4054<br>439 | -<br>0.386<br>3962 | -<br>0.3455<br>797 | -<br>0.2829<br>944 | -<br>0.2040<br>825 | -<br>0.1061<br>229 |
| VBO          | 0 | -<br>1.188        | -<br>1.374<br>8072 | -<br>1.439<br>2971 | -<br>1.4783<br>448 | -<br>1.5001<br>136 | -<br>1.476<br>4402 | -<br>1.4425<br>558 | -<br>1.3647<br>87  | -<br>1.2232<br>898 | -<br>0.7702<br>275 |
| CBO          | 0 | 0.336             | 0.409<br>1928      | 0.444<br>9029      | 0.4058<br>552      | 0.3449<br>864      | 0.248<br>4598      | 0.1010<br>442      | -<br>0.0818<br>87  | -<br>0.3820<br>898 | -<br>0.8690<br>275 |
